# Supplementary material for: Basic Properties and Qualitative Dynamics of a Vector-Borne Disease Model with Vector Stages and Vertical Transmission
Source: Hindawi journal article supplement (doi:10.1155/2018/2618985), 2018-11-01
Supplement: f1 [file 2618985.f1.pdf]

# Basic Properties and Qualitative Dynamics of a Vector-borne Disease Model with Vector Stages and Vertical Transmission

Sansao A. Pedro

Departamento de Matemática e Informática,  
Universidade Eduardo Mondlane, 257, Maputo, Mozambique.

## Abstract

This work systematically discusses basic properties and qualitative dynamics of vector-borne disease models, particularly those with vertical transmission in the vector population. Examples of disease include Dengue and Rift Valley fever which are endemic in Sub-Saharan Africa and understanding of the dynamics underlying their transmission is central for providing critical informative indicators useful for guiding control strategies. Of particular interest is the applicability and derivation of relevant population and epidemic thresholds and their relationships with vertical infection. This study demonstrates how the failure of  $R_0$  derived using the next-generation method compounds itself when varying vertical transmission efficiency, and shows that the host type reproductive number gives the correct  $R_0$ . Further, novel relationships between the host type reproductive number, vertical infection and ratio of female mosquitoes to host are established and discussed.

Analytical results of the model with vector stages show that the quantities  $Q_0$ ,  $Q_0^v$  and  $R_0^c$ , which represent the vector colonization threshold, the average number of female mosquitoes produced by a single infected mosquito and effective reproductive number, respectively, provide threshold conditions that determine the establishment of the vector population and invasion of the disease. Numerical simulations are also conducted to confirm and extend the analytical results. The findings imply that while vertical infection increases the size of an epidemic it in turns reduces its duration, and control efforts aiming at reducing the critical thresholds  $Q_0$ ,  $Q_0^v$  and  $R_0^c$  to below unity are viable control strategies.

**Keywords:** Vector-borne disease, Vertical transmission, Mathematical modelling, Epidemic thresholds, Qualitative dynamics

**SM:** Supplementary Materials

## A-1 The basic and type reproductive numbers of the basic model

In this section we provide details for the derivation of both the basic and type reproductive numbers. For instructive purpose we reconstruct the spectral matrix  $K$  by directly noting that the element  $(i, j)$  is the expected number of new infections of type  $i$  produced by an infected individual of type  $j$  [5]. For system (1) we have two types of infectious individuals:  $I_v$  and  $I_h$ . An individual of type  $I_v$  causes  $q_v$  new infections of type  $I_v$  and  $\frac{p_{hv}\alpha m}{\mu_v}$  new infections of type  $I_h$ . While an individual of type  $I_h$  causes  $\frac{p_{vh}\alpha}{\gamma_h + \mu_h}$  new infections of type  $I_v$  and zero new infections of type  $I_h$ . All components of the next-generation matrix have now been completed and the basic reproductive number is then the spectral radius  $\rho(K)$  [16]. To obtain specific type reproductive numbers we follow the approach in [13], where the host type reproductive number  $T_1^h$ , that is the number of new individuals of type  $I_h$  resulting from one individual of type  $I_h$  is,

$$T_1^h = e_h^T K (I - (I - P_h)K)^{-1} e_h, \quad (\text{A-1})$$

where  $e_h = (0, 1)$ ,  $P_h$  is a  $2 \times 2$  matrix with  $P_{22} = 1$  and all other elements zero.  $T$  represents the transpose and  $I$  is the identity matrix. And, the vector type reproductive  $T_1^v$ , that is the number of

new individuals of type  $I_v$  resulting from one individual of type  $I_v$  is then given by:

$$T_1^h = e_v^T K(I - (I - P_v)K)^{-1} e_v, \quad (\text{A-2})$$

where  $e_v = (1, 0)$ ,  $P_h$  is a  $2 \times 2$  matrix with  $P_{11} = 1$  and all other elements zero.  $T$  represents the transpose and  $I$  is the identity matrix.

## A-2 Existence of model equilibria

Let  $X^* = (L^*, S_v^*, I_v^*, S_h^*, I_h^*)$  be an arbitrary equilibrium of system (2). Then,

$$\begin{aligned} \frac{dS_v}{dt} + \frac{dI_v}{dt} &= \frac{\theta}{\delta}(1 - N_v)L_s^* + \frac{\theta}{\delta}(1 - N_v)L_i^* - \mu_v N_v = 0, \\ \frac{\theta}{\delta}(1 - N_v)L^* &= 0, \\ N_v &= \frac{\theta L^*}{\theta L^* + \delta \mu_v} \end{aligned}$$

Now that we know  $N_v$  we can find  $L^*$ ,

$$\begin{aligned} \frac{dL_s}{dt} + \frac{dL_i}{dt} &= \delta r(1 - L^*)N_v - (\theta + \mu_L)L^* = 0, \\ L^* &= \frac{\delta(r\theta - \mu_v(\theta + \mu_L))}{\theta(\delta r + \theta + \mu_L)} = \frac{\delta r(1 - Q_0^{-1})}{\delta r + \theta + \mu_L}, \end{aligned}$$

with  $Q_0 = \frac{r\theta}{\mu_v(\theta + \mu_L)}$ .

Since  $L^*$  has been defined explicitly we can now define,

$$\frac{\theta}{\delta}(1 - N_v) = \frac{\delta r \mu_v \theta + \mu_v \theta(\theta + \mu_L)}{\delta r(\theta + \delta \mu_v)}.$$

From  $\frac{dI_v}{dt} = 0$  we obtain  $\lambda_{vh} I_h^* S_v^* = \mu_v I_v^* - \frac{\theta}{\delta}((1 - N_v)L_i^*$  and from  $\frac{dS_v}{dt} = 0$  we obtain,

$$\begin{aligned} \frac{\theta}{\delta}((1 - N_v)L_s^* + \frac{\theta}{\delta}((1 - N_v)L_i^* - \mu_v I_v^* - \mu_v S_v^* &= 0, \\ \frac{\theta}{\delta}((1 - N_v)L^* - \mu_v I_v^* &= \mu_v S_v^*, \\ S_v^* = P^* - I_v^*, \quad \text{with} \quad P^* &= \frac{\theta(1 - Q_0^{-1})}{\theta + \delta \mu_v}. \end{aligned}$$

From  $\frac{dS_h}{dt} = 0$  we obtain

$$I_v^* = \frac{\mu_h(1 - S_h^*)}{\lambda_{hv} S_h^*},$$

and when replacing  $I_v^*$  on  $\frac{dI_h}{dt} = 0$  we obtain

$$S_h^* = 1 - \frac{\gamma_h + \mu_h}{\mu_h} I_h^*,$$

and  $\frac{dL_i}{dt} = 0$  yields

$$\begin{aligned} L_i^* &= \frac{\delta r(1 - L^*)q_v I_v^*}{\theta + \mu_L}, \\ L_i^* &= H q_v I_v^*, \quad \text{with} \quad H = \frac{\delta r(\theta + \delta \mu_v)}{\theta(\delta r + \theta + \mu_L)}. \end{aligned}$$

Note that  $\frac{\theta}{\delta}((1 - N_v)L_i^* = \frac{\theta}{\delta}((1 - N_v)Hq_vI_v^* = q_v\mu_vI_v^*$ . Thus, substituting  $L_i^*$  into  $\frac{dI_v}{dt} = 0$  we obtain,

$$\lambda_{vh}I_h^*S_v^* - (1 - q_v)\mu_vI_v^* = 0 \quad (\text{A-3})$$

Now replacing  $S_v^*$  and  $I_v^*$  into equation (A-3) we obtain

$$I_h^* = \frac{(1 - q_v)\mu_v(\gamma_h + \mu_h)(R_0^c - 1)}{\frac{\lambda_{vh}\lambda_{hv}P^*(\gamma_h + \mu_h)}{\mu_h} + \frac{\lambda_{vh}}{(1 - q_v)\mu_v}}.$$

## A-3 Model parameters and references

| Parameter    | Description                                       | Baseline | Units              | Reference     |
|--------------|---------------------------------------------------|----------|--------------------|---------------|
| $1/\mu_v$    | Adult mosquito's life span                        | 25       | days               | [10, 4]       |
| $1/\mu_L$    | Aquatic mosquito's life span                      | 18       | days               | [9, 8]        |
| $1/\theta$   | Development time in aquatic form                  | 5        | days               | [9, 8]        |
| $r$          | Mosquito oviposition rate                         | 5        | days <sup>-1</sup> | [9, 8]        |
| $1/\mu_h$    | Livestock life span                               | 2190     | days               | [6]           |
| $q_1$        | Probability of vertical transmission              | 0-1      |                    | [14]          |
| $\alpha$     | Mosquito biting rate                              | 0.71     |                    | [3]           |
| $p_{hv}$     | Probability of successful infection in livestock  | 0.21     |                    | [12, 15, 4]   |
| $\beta_{vh}$ | Probability of successful infection in mosquitoes | 0.51     |                    | [12, 15, 4]   |
| $1/\gamma_h$ | Infectious duration in livestock                  | 4        | days               | [1, 2, 11, 4] |
| $m$          | Adult mosquitoes to livestock ratio               | 1.5      |                    | [7]           |
| $\delta$     | Adult to aquatic mosquito ratio                   | 0.4      |                    | Chosen        |

Table 1: Parameter description, values, units and references corresponding to RVF disease.

## References

- [1] Y. Ba, D. Diallo, C. M. F. Kebe, I. Dia, and M. Diallo. Aspects of Bioecology of Two Rift Valley Fever Virus Vectors in Senegal (West Africa):  $\text{Aedes vexans}/I_i$  and  $\text{Culex poicilipes}/I_i$  (Diptera: Culicidae). *Journal of Medical Entomology*, 42(5):739–750, 2005.
- [2] B. Bird, T. Ksiazek, S. Nichol, and N. MacLachlan. Rift valley fever virus. *J. Am. Vet. Med. Assoc.*, 234(7):883–893, 2009.
- [3] D. Canyon, J. Hii, and R. Muller. The frequency of host biting and its effect on oviposition and survival in *Aedes aegypti* (Diptera: Culicidae). *Bulletin of Entomological Research*, 89(01):35–39, 1999.
- [4] N. Chitnis, J. M. Hyman, and C. A. Manore. Modelling vertical transmission in vector-borne diseases with applications to Rift Valley fever, 2013.
- [5] Diekmann and J. Heesterbeek. *Mathematical Epidemiology of Infectious Diseases: Model Building, Analysis and Interpretation* - O. Diekmann, J. A. P. Heesterbeek. 2000.
- [6] H. D. Gaff, D. M. Hartley, and N. P. Leahy. An epidemiological model of rift valley fever. *Electronic Journal of Differential Equations*, 2007:1–12, 2007.
- [7] S. Gupta, J. Swinton, and R. M. Anderson. Theoretical studies of the effects of heterogeneity in the parasite population on the transmission dynamics of malaria. *Proceedings of the Royal Society B: Biological Sciences*, 256(1347):231–238, 1994.

- [8] L. C. Harrington, T. W. Scott, K. Lerdthusnee, R. C. Coleman, A. Costero, G. G. Clark, J. J. Jones, S. Kittawee, P. Kittayapong, R. Sithiprasasna, and J. D. Edman. Dispersal of the dengue vector *Aedes aegypti* within and between rural communities. *American Journal of Tropical Medicine and Hygiene*, 72(2):209–220, 2005.
- [9] H. Hiang, M. Macoris, K. Galvani, and M. Andrighetti. Dinâmica da Transmissão da Dengue com Dados Entomológicos Temperatura-dependentes. *TEMA - Tendências em Matemática Aplicada e Computacional*, 8(1):159–168, 2007.
- [10] T. R. Kasari, D. A. Carr, T. V. Lynn, and J. T. Weaver. Evaluation of pathways for release of Rift Valley fever virus into domestic ruminant livestock, ruminant wildlife, and human populations in the continental United States. *Journal of the American Veterinary Medical Association*, 232(4):514–529, 2008.
- [11] V. Martin, V. Chevalier, P. Ceccato, A. Anyamba, L. De Simone, J. Lubroth, S. de La Rocque, and J. Domenech. The impact of climate change on the epidemiology and control of Rift Valley fever. *Revue scientifique et technique (International Office of Epizootics)*, 27(2):413–426, 2008.
- [12] M. Pepin, M. Bouloy, B. H. Bird, A. Kemp, and J. Paweska. Rift Valley fever virus (Bunyaviridae: Phlebovirus): An update on pathogenesis, molecular epidemiology, vectors, diagnostics and prevention, 2010.
- [13] M. G. Roberts and J. A. P. Heesterbeek. A new method for estimating the effort required to control an infectious disease. *Proceedings of the Royal Society of London Series B-Biological Sciences*, 270(1522):1359–1364, 2003.
- [14] W. Romoser, M. Oviedo, K. Lerdthusnee, L. Patrican, M. Turell, D. Dohm, K. Linthicum, and C. Bailey. Rift Valley fever virus-infected mosquito ova and associated pathology: possible implications for endemic maintenance. *Research and Reports in Tropical Medicine*, 2:121–127, 2011.
- [15] M. J. Turell, C. A. Rossi, and C. L. Bailey. Effect of extrinsic incubation temperature on the ability of *Aedes taeniorhynchus* and *Culex pipiens* to transmit Rift Valley fever virus. *American Journal of Tropical Medicine and Hygiene*, 34(6):1211–1218, 1985.
- [16] P. Van Den Driessche and J. Watmough. Reproduction numbers and sub-threshold endemic equilibria for compartmental models of disease transmission, 2002.
